# Hypoxia Stimulates the EMT of Gastric Cancer Cells through Autocrine TGF $\beta$ Signaling

Junko Matsuoka<sup>1</sup>, Masakazu Yashiro<sup>1,2\*</sup>, Yosuke Doi<sup>1</sup>, Yuhiko Fuyuhiko<sup>1</sup>, Yukihiko Kato<sup>1</sup>, Osamu Shinto<sup>1</sup>, Satoru Noda<sup>1</sup>, Shinichiro Kashiwagi<sup>1</sup>, Naoki Aomatsu<sup>1</sup>, Toshiki Hirakawa<sup>1</sup>, Tsuyoshi Hasegawa<sup>1</sup>, Kiyoshi Shimizu<sup>3</sup>, Toshiyuki Shimizu<sup>4</sup>, Atsushi Miwa<sup>5</sup>, Nobuya Yamada<sup>1</sup>, Tetsuji Sawada<sup>1</sup>, Kosei Hirakawa<sup>1</sup>

**1** Department of Surgical Oncology, Osaka City University Graduate School of Medicine, Abeno-ku, Osaka, Japan, **2** Oncology Institute of Geriatrics and Medical Science, Osaka City University Graduate School of Medicine, Abeno-ku, Osaka, Japan, **3** Pharmacological Research Laboratories, Kyowa Hakko Kirin Co., Ltd., Chiyodaku, Tokyo, Japan, **4** Research Planning Department, Kyowa Hakko Kirin Co., Ltd., Chiyodaku, Tokyo, Japan, **5** Biologics Research Laboratories, Kyowa Hakko Kirin Co., Ltd., Chiyodaku, Tokyo, Japan

## Abstract

Epithelial mesenchymal transition (EMT) is considered to be correlated with malignancy of cancer cells and responsible for cancer invasion and metastasis. We previously reported that distant metastasis was associated with hypoxia in gastric cancer. We therefore investigated the effect of hypoxic condition on EMT of gastric cancer cells. Gastric cancer cells were cultured in normoxia (21% O<sub>2</sub>) or hypoxia (1% O<sub>2</sub>) for 24 h. EMT was evaluated as the percentage of spindle-shaped cells in total cells. Effect of transforming growth factor  $\beta$ 1 (TGF $\beta$ 1) or tyrosine kinase inhibitors on the EMT was evaluated. The expression level of TGF $\beta$ 1 and TGF $\beta$ R was evaluated by real time RT-PCR. The TGF $\beta$ 1 production from cancer cells was measured by ELISA. Hypoxia stimulated EMT of OCUM-2MD3 and OCUM-12 cells, but not that of OCUM-2M cells. The expression level of TGF $\beta$ 1 mRNA under hypoxia was significantly higher than that under normoxia in all of three cell lines. The expression level of TGF $\beta$ R mRNA was significantly increased by hypoxia in OCUM-2MD3 cells, but not in OCUM-2M cells. TGF $\beta$ R inhibitor, SB431542 or Ki26894, significantly suppressed EMT of OCUM-2MD3 and OCUM-12. TGF $\beta$ 1 production from OCUM-2MD3 and OCUM-12 cells was significantly increased under hypoxia in comparison with that under normoxia. These findings might suggest that hypoxia stimulates the EMT of gastric cancer cells via autocrine TGF $\beta$ /TGF $\beta$ R signaling.

**Citation:** Matsuoka J, Yashiro M, Doi Y, Fuyuhiko Y, Kato Y, et al. (2013) Hypoxia Stimulates the EMT of Gastric Cancer Cells through Autocrine TGF $\beta$  Signaling. PLoS ONE 8(5): e62310. doi:10.1371/journal.pone.0062310

**Editor:** Claudio M. Costa-Neto, University of São Paulo, Brazil

**Received:** October 19, 2012; **Accepted:** March 19, 2013; **Published:** May 17, 2013

**Copyright:** © 2013 Matsuoka et al. This is an open-access article distributed under the terms of the Creative Commons Attribution License, which permits unrestricted use, distribution, and reproduction in any medium, provided the original author and source are credited.

**Funding:** This study was supported in part by the National Cancer Center Research and Development Fund (23-A-9), and by Grants-in Aid for Scientific Research (KAKENHI, Nos. 20591573, 22390262, and 23390329) from the Ministry of Education, Science, Sports, Culture and Technology of Japan. The funders had no role in study design, data collection and analysis, decision to publish, or preparation of the manuscript.

**Competing Interests:** The authors have the following interests. KS, TS, and AM are employees of Kyowa Hakko Kirin Co. Ltd. Ki26894, which was used in this study, is a product of Kyowa Hakko Kirin Co. Ltd. There are no further patents, products in development or marketed products to declare. This does not alter the authors' adherence to all the PLOS ONE policies on sharing data and materials, as detailed online in the guide for authors.

\* E-mail: m9312510@med.osaka-cu.ac.jp

## Introduction

Epithelial mesenchymal transition (EMT) is characterized by changes in cell morphology during which epithelial cells acquire mesenchymal properties while losing cell-cell interactions and apicobasal polarity [1,2]. In epithelial cancers, EMT is recognized as one of the mechanisms responsible for initiating the invasive and metastatic behaviors [3–5].

A hypoxic environment exists in some regions of solid cancers that show rapid growth because angiogenesis in carcinomas is heterogeneous [6]. Hypoxia is considered to be associated with aggressive tumor phenotypes of gastric carcinomas [7,8], including metastatic ability of cancer cells [6,9]. Clinical and experimental data also provide evidence of an association between the hypoxic environment and poor prognosis [10,11]. It is thus important for the future development of cancer treatments to clarify the mechanism of metastasis induced by hypoxia.

It has been reported that various soluble factors, including transforming growth factor- $\beta$ 1 (TGF $\beta$ 1) [12,13], epidermal growth factor (EGF) [14], insulin-like growth factor-1 (IGF1) [15], fibroblast growth factor (FGF) [16], hepatocyte growth factor (HGF) [17] were correlated with EMT. TGF $\beta$  signals have an important role in various aspects of the metastatic spread of cancer cells, such as migration, invasion, and EMT [12,13]. The TGF $\beta$  ligands bind to TGF $\beta$  receptor type II (TGF $\beta$ RII), which then forms a complex with either TGF $\beta$ R type I or II. TGF $\beta$ R type I (TGF $\beta$ RI) transmits signals within the cell via second-messenger Smad proteins [13,18]. Downstream signals are propagated through TGF $\beta$ RI, which phosphorylates receptor-regulated Smad proteins [19,20].

Several studies have reported that a hypoxic condition might induce EMT of cancer cells [21–24], but the molecular mechanism responsible for EMT under a hypoxic condition remains unclear. We therefore investigated the effect of hypoxia on the morphologic characteristics of gastric cancer cells to clarify the mechanisms responsible for hypoxia-induced EMT.

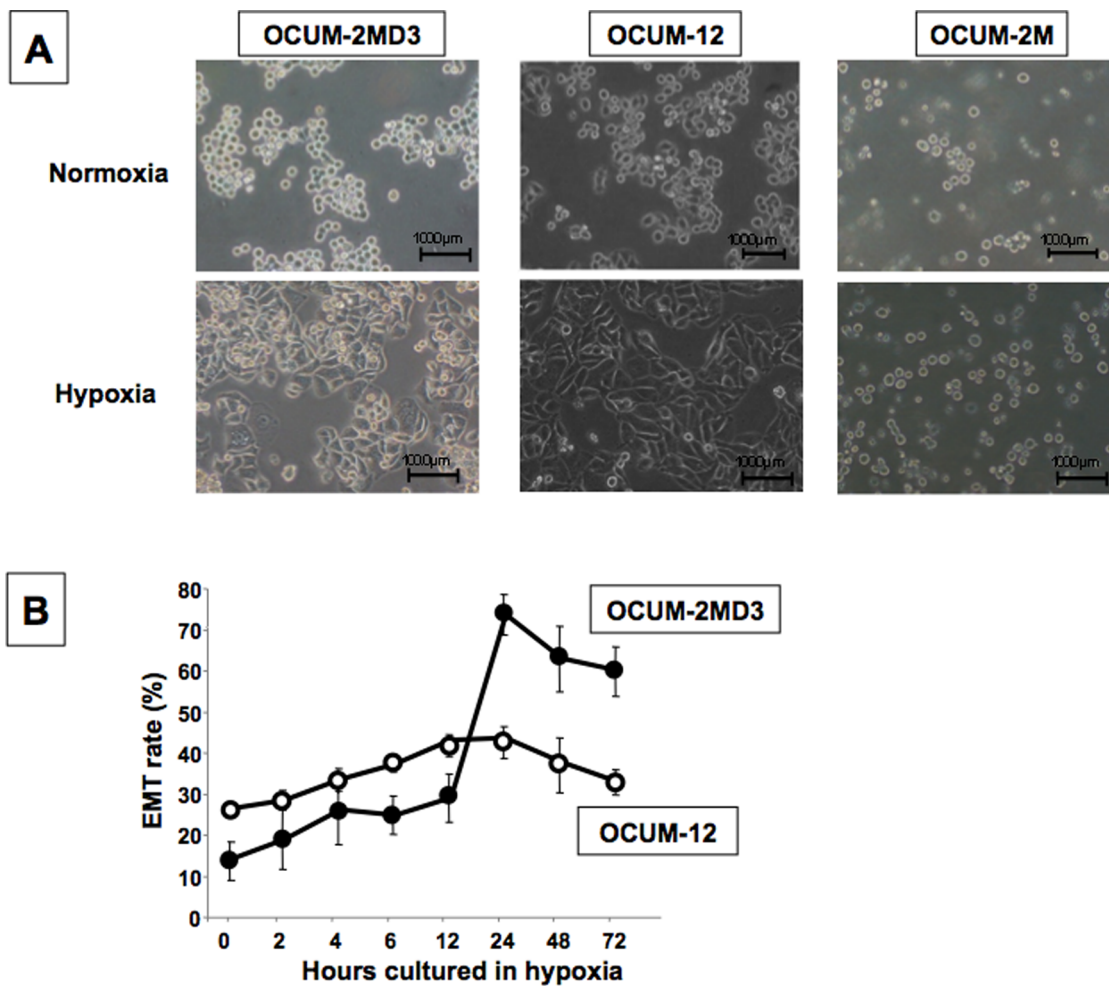

**Figure 1. Morphologic changes of gastric cells under a hypoxic condition.** (A) An increase of polygonal or spindle-shape cells was recognized in OCUM-2MD3 and OCUM-12 cells under hypoxia, but not in OCUM-2M cells. (B) The morphology of OCUM-2MD3 and OCUM-12 cells began to change after 4 h in hypoxic culture. EMT of OCUM-2MD3 and OCUM-12 cells was most evident at 24 h of culture under hypoxia. EMT was determined when the polygonal or spindle shape was found in cancer cells by phase-contrast microscope. doi:10.1371/journal.pone.0062310.g001

## Materials and Methods

### Cell Culture and Cell lines

Seven gastric cancer cell lines were used. OCUM-2MD3 [25], OCUM-12 [26], OCUM-2M [27], KATO-III [28], and MKN-45 [29] were derived from diffuse-type gastric carcinoma. MKN-74 [29] and MKN-7 [29] were derived from intestinal-type. OCUM-2M, OCUM-2MD3 and OCUM-12 were established in our laboratory, as previously reported [25–27]. Briefly, OCUM-12 was derived from ascites associated with diffuse-type gastric carcinoma, and OCUM-2MD3 cells, a daughter cell line with high potential of peritoneal metastasis, were established from OCUM-2M cells using orthotopic tumor model, a parental cell line ascites associated with diffuse-type gastric carcinoma. The other cell lines were obtained from the JCRB cell bank (Osaka, Japan) or the American Type Culture Collection (Rockville, MD). Cells were cultured at 37°C in 21% O<sub>2</sub> (normoxia) or 1% O<sub>2</sub> (hypoxia). Hypoxic conditions were maintained using a modular incubator chamber (Hirasawa, Tokyo, Japan) with 5% CO<sub>2</sub> and 1% O<sub>2</sub> balanced with N<sub>2</sub> gas. The culture medium consisted of Dulbecco's modified Eagle medium (DMEM; Nikken Bio., Osaka, Japan) with 10% fetal bovine serum (Nichirei Bio.), 100 IU/ml

penicillin (ICN Biomedicals, Costa Mesa, CA), 100 µg/ml streptomycin (ICN Biomedicals), and 0.5 mM sodium pyruvate (Cambrex, Walkersville, MD).

### Morphological changes

Cancer cells were cultured under normoxic or hypoxic conditions for 24 h, and cell morphology was observed microscopically. EMT was determined when the polygonal or spindle shape was found in cancer cells by phase-contrast microscope. The frequency of EMT was evaluated by the rate of polygonal or spindle-shaped cells in all cancer cells; EMT rate = the number of polygonal or spindle shape cells/total number of cells × 100 (%).

### Effects of various soluble factors on morphological changes

We examined the effects of various soluble factors, including EGF (Pepro Tec, Rocky Hill, NJ), IGF1 (Pepro Tec), vascular endothelial cell growth factor (VEGF; R&D systems, Minneapolis, MN), basic-FGF (Sigma, Saint Louis, MO), platelet-derived growth factor BB homodimer (PDGF-BB; Pepro Tech), HGF (Pepro Tech), TGF $\beta$ 1 (King Brewing, Kakogawa, Japan), on the

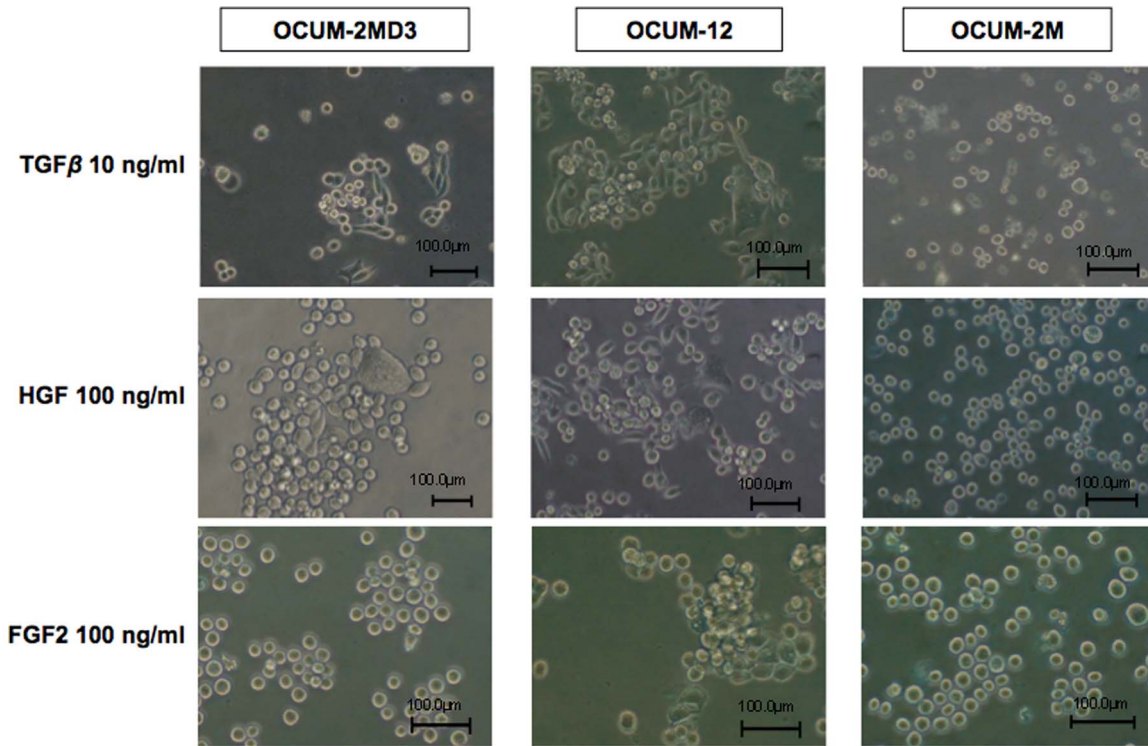

**Figure 2. Effects of various growth factors on cancer cell morphology.** Morphologic change was found in the presence of TGFβ and HGF at 24 h of culture in OCUM-2MD3 and OCUM-12 cells, but not FGF2. doi:10.1371/journal.pone.0062310.g002

morphology of cancer cells. Cells were cultured in DMEM containing one of above factors at the required concentration at 37°C in normoxia. Cell morphology was examined after 24 h. Experiments were performed for each factor in duplicate.

**Effects of neutralizing antibodies on morphological changes**

We used neutralizing antibodies, such as anti-HGF antibody (Genzyme technne, MPLS, MN, USA), anti-TGFβ antibody (R&D systems), anti-PDGF-BB (Genzyme), anti-FGF7 (R&D systems),

anti-VEGFR3 (R&D systems). Cells were cultured in DMEM containing one of above antibodies at 100 µg/ml at 37°C in hypoxia. Cell morphology was examined after 24 h.

**Effect of various phospholylation inhibitors on morphological changes**

After cells reached semi-confluence, cells were added to TGFβ or each inhibitor and incubated under hypoxic condition or normoxia for 24 h. Then, morphologic findings were examined in comparison with the control. Five small-synthetic phospholylation

**Table 1. Effects of various growth factors on cancer cell morphology.**

| Growth Factor | OCUM-2MD3     |           | OCUM-12       |           | OCUM-2M       |           |
|---------------|---------------|-----------|---------------|-----------|---------------|-----------|
|               | concentration |           | concentration |           | concentration |           |
|               | 10 ng/ml      | 100 ng/ml | 10 ng/ml      | 100 ng/ml | 10 ng/ml      | 100 ng/ml |
| TGFβ1         | +             | +         | +             | +         | -             | -         |
| HGF           | -             | +         | -             | +         | -             | -         |
| FGF2          | -             | -         | -             | -         | -             | -         |
| FGF7          | -             | -         | -             | -         | -             | -         |
| EGF           | -             | -         | -             | -         | -             | -         |
| IGF1          | -             | -         | -             | -         | -             | -         |
| VEGF          | -             | -         | -             | -         | -             | -         |
| PDGF-BB       | -             | -         | -             | -         | -             | -         |

+; Positive morphologic changes, -; No changes. The culture medium was consisted of DMEM with 10% FBS. doi:10.1371/journal.pone.0062310.t001

**Table 2.** Effects of neutralizing antibodies on cancer cell morphology under hypoxia.

| Neutralizing antibody                      | OCUM-2MD3 | OCUM-12 |
|--------------------------------------------|-----------|---------|
| anti-TGF $\beta$ antibody (100 $\mu$ g/ml) | +         | +       |
| anti-HGF antibody (100 $\mu$ g/ml)         | -         | -       |

Effects of neutralizing antibodies were determined after 24 h of culture.

+, Partly effective, -, Not effective.

The culture medium was consisted of DMEM with 10% FBS.

doi:10.1371/journal.pone.0062310.t002

inhibitors, Ki26894 (TGF $\beta$ R1 inhibitor, 10  $\mu$ M; Kirin Pharma, Mishima, Japan), SB431542 (TGF $\beta$ R1 inhibitor, 10  $\mu$ M; Sigma, Saint Louis, MO), Sunitinib (SU11248, 20 nM; a tyrosine kinase inhibitor against VEGFR, PDGFR, c-KIT, FGFR2 and FLT3, LKT Laboratories, St. Paul, MN), PD173074 (FGF/VEGF receptor tyrosine kinase inhibitor, 5 nM; Santa Cruz, CA), Lapatinib (GW572016, 10 nM; a tyrosine kinase inhibitor against EGFR and ErbB2, Toronto Research Chemicals), and PHA665752 (c-MET inhibitor, 2  $\mu$ M; Pfizer, San Diego, CA, USA) were used.

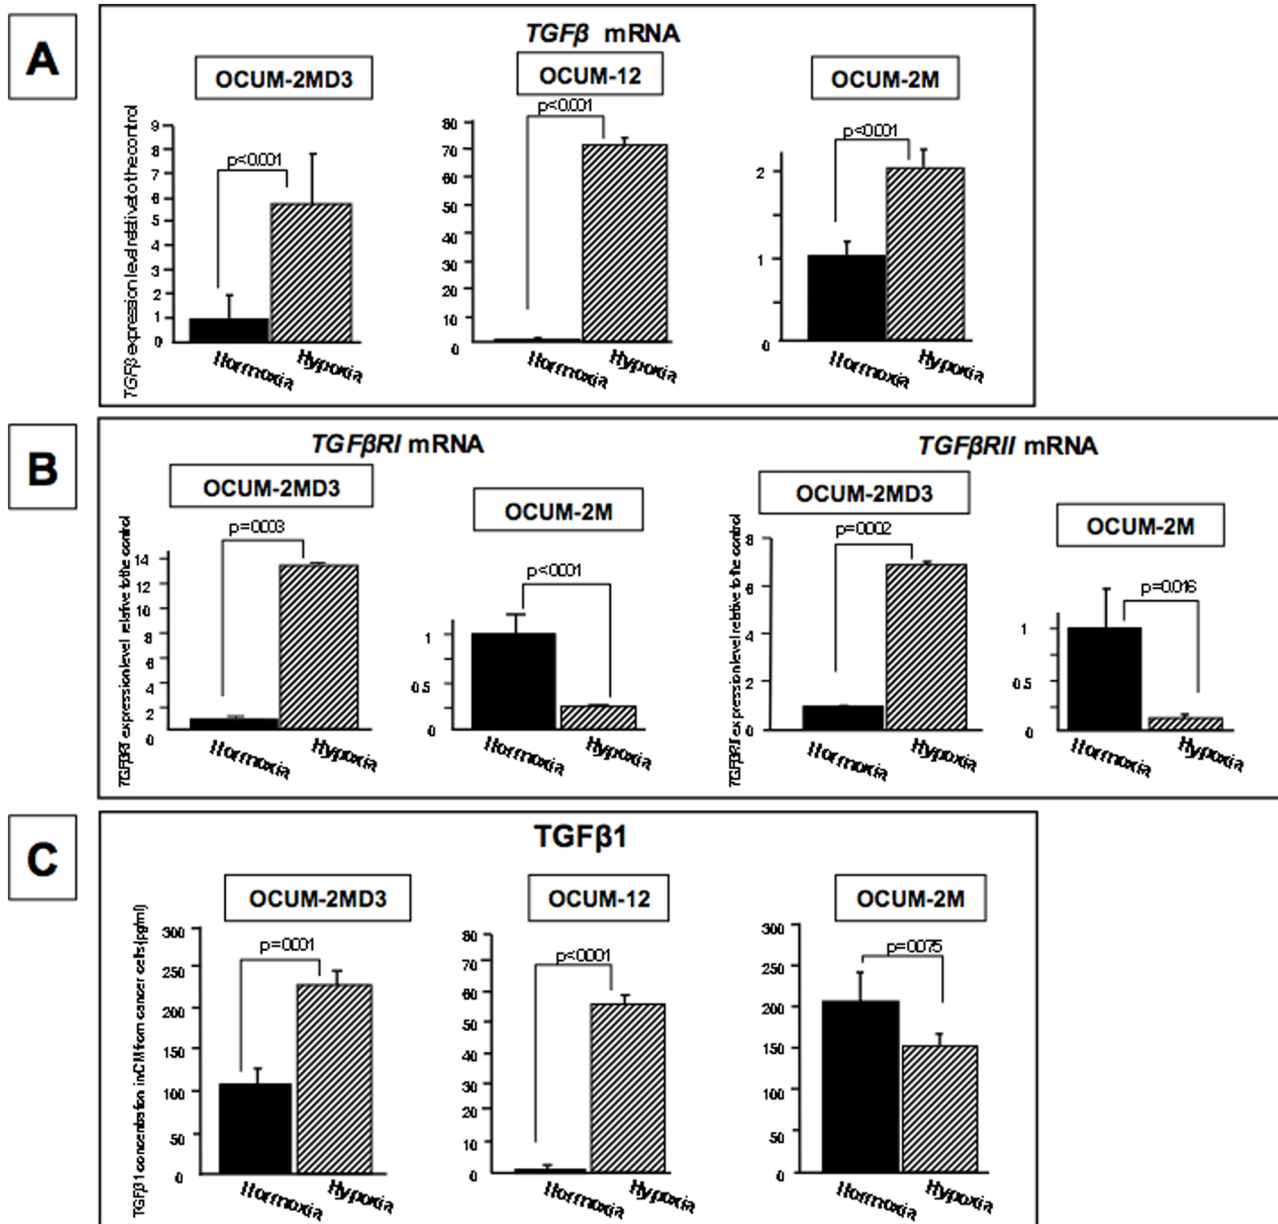

**Figure 3. Effects of hypoxia on the expressions of TGF $\beta$  and TGF $\beta$ R and the production of TGF $\beta$ 1 in cancer cells.** (A) TGF $\beta$  mRNA expression was significantly ( $p<0.001$ ) increased under a hypoxic condition in OCUM-2M, OCUM2MD3 and OCUM-12 cells. (B) The expression levels of TGF $\beta$ RI and TGF $\beta$ RII were significantly ( $p<0.001$ ) increased under a hypoxic condition in OCUM-2MD3, but not in OCUM-2M cells. (C) TGF $\beta$ 1 production in OCUM-2MD3 and OCUM-12 cells was significantly ( $p=0.001$  and  $p<0.001$ ) higher under hypoxia (232 pg/ml, 80 pg/ml, respectively) than under normoxia (109 pg/ml, 34 pg/ml, respectively). TGF $\beta$ 1 production in OCUM-2M cells was not different between normoxia and hypoxia. doi:10.1371/journal.pone.0062310.g003



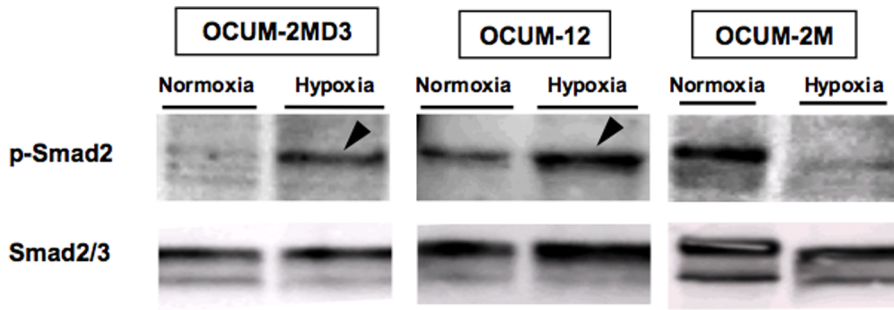

**Figure 4. Smad2 phosphorylation of gastric cancer cells under a hypoxic condition.** Hypoxic condition for 24 h increased Smad2 phosphorylation of OCUM-2MD3 and OCUM-12 cells (arrowheads), but not that of OCUM-2M cells. Smad2/3 was used as an internal control for p-Smad2.  
doi:10.1371/journal.pone.0062310.g004

**Quantitative real-time reverse transcriptase-polymerase chain reaction (RT-PCR)**

Quantitative RT-PCR was performed to examine *TGFβ1*, *TGFβRI*, *TGFβRII*, and *Vimentin* mRNA expressions. Cancer cells were incubated under normoxic conditions and under hypoxic conditions for 24 h. After incubation, the total cellular RNA was

extracted using Trizol reagent (Invitrogen, Carlsbad, CA) according to the manufacturer’s instructions. After removal of genomic DNA by DNase, cDNA was prepared from 2 μg RNA with Maloney mouse leukemia virus reverse transcriptase (Invitrogen) using random primers (Invitrogen). To determine fold changes in each gene, real-time RT-PCR was performed on the ABI Prism

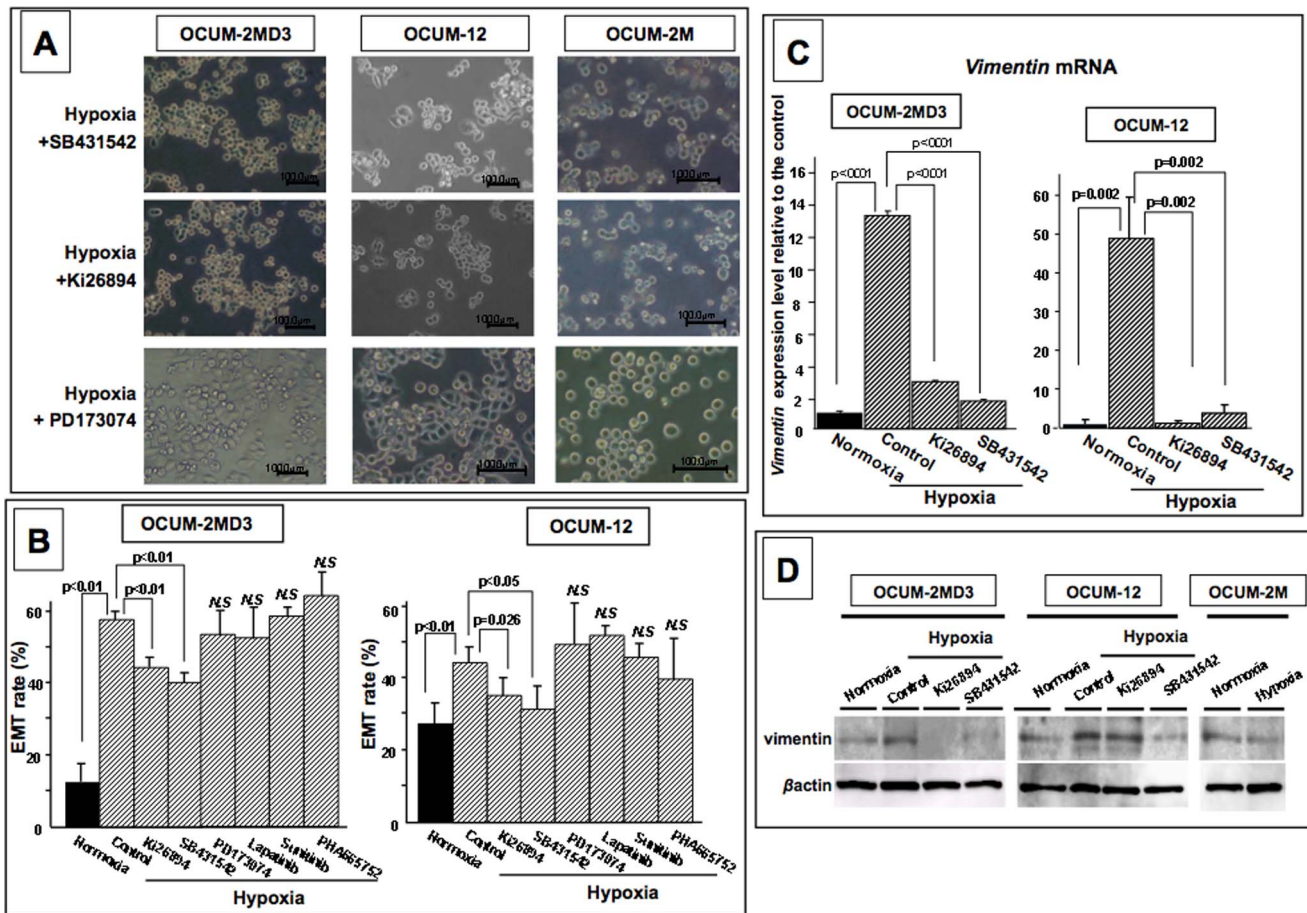

**Figure 5. Effects of inhibitors on EMT under hypoxic condition.** (A, B) Hypoxia-induced EMT was significantly ( $p < 0.01$ ) inhibited by TGFβR inhibitors (Ki26894 and SB431542). Other inhibitors (Lapatinib, Sunitinib, and PHA665752) had no effect on EMT under hypoxia. (C) *Vimentin* mRNA expression was significantly increased under a hypoxic condition in OCUM-2M and OCUM-12 cells, and decreased with TGFβR inhibitors (Ki26894 and SB431542). (D) Vimentin protein was increased under hypoxia in OCUM-12 and OCUM-2MD3, and decreased with TGFβR inhibitors (Ki26894 and SB431542).  
doi:10.1371/journal.pone.0062310.g005

7000 (Applied Biosystems, Foster City, CA), using commercially available gene expression assays for *TGF $\beta$ 1* (Hs00998130), *TGF $\beta$ RI* (Hs00610319), *TGF $\beta$ RII* (Hs00559661), *vimentin* (Hs00958116), *Twist* (Hs01675818), *Zeb1* (Hs 00232783), *Snail1* (Hs00195591), *VEGFA* (Hs00900055). PCR was performed at 95°C for 15 s and 60°C for 60 s for 40 cycles. Glyceroldehyde-3-phosphate dehydrogenase (GAPDH) was used as an internal standard to normalize mRNA levels for differences in sample concentration and loading. Fold changes in the expression of each target mRNA relative to GAPDH was calculated based on the threshold cycle (Ct) as  $2^{-\Delta(\Delta Ct)}$ , where  $\Delta Ct = Ct_{\text{target}} - Ct_{\text{GAPDH}}$  and  $\Delta(\Delta Ct) = \Delta Ct_{\text{hypoxia}} - \Delta Ct_{\text{normoxia}}$ . Quantitative PCR reactions were performed in triplicate.

### Western blot analysis

For examining the effect of hypoxia on Smad2 phosphorylation, cancer cells were incubated under normoxic or hypoxic conditions for 24 h, respectively. The cells were lysed in a lysis buffer, and aliquots containing 50  $\mu$ g of total protein were subjected to sodium dodecyl sulfate-polyacrylamide gel electrophoresis; the protein bands were transferred to a polyvinylidene difluoride membrane (Millipore, Billerica, MA). The membrane was incubated in TBS-T (10 mM TBS and 0.05% Tween 20) supplemented with 5% non-fat milk or 5% bovine albumin (Sigma) at room temperature for 1 h. Next, the membrane was placed in a TBS-T solution containing the primary antibody p-Smad2 (Ser<sup>465/467</sup>; 1:1000;

Cell Signaling Technology) or Smad2/3 (1:1000; Cell Signaling Technology), Vimentin (1:1000; Cell Signaling Technology), anti- $\beta$ actin (1:1000; Sigma) and allowed to react at 4°C overnight. Then, each antibody was washed three times with TBS-T for 10 min, and a peroxidase-labeled secondary antibody (GE healthcare, Buckinghamshire, UK) reactive with the primary antibody was added. The bands were detected using an enhanced chemiluminescence system (Wako, Osaka, Japan).

### Enzyme-linked immunosorbent assay (ELISA)

The TGF $\beta$ 1 production from cancer cells was measured by a quantitative sandwich enzyme immunoassay technique using a Quantikine human TGF $\beta$ 1 ELISA kit, according to the manufacturer's instruction (R&D systems). Cancer cells were incubated under hypoxia or normoxia for 24 h, then the medium was replaced to 3 ml serum free DMEM. Cells were incubated under hypoxia or normoxia, for additional 24 h. Conditional medium (CM) was collected from each dish and centrifuged at 1000 g for 5 min. TGF $\beta$ 1 level of serum free CM was measured using ELISA kit. ELISA detected both the active and latent TGF $\beta$ .

### Statistical analysis

Comparisons among data sets were made with Student's *t*-test or the Kruskal-Wallis one-way ANOVA by ranks followed by

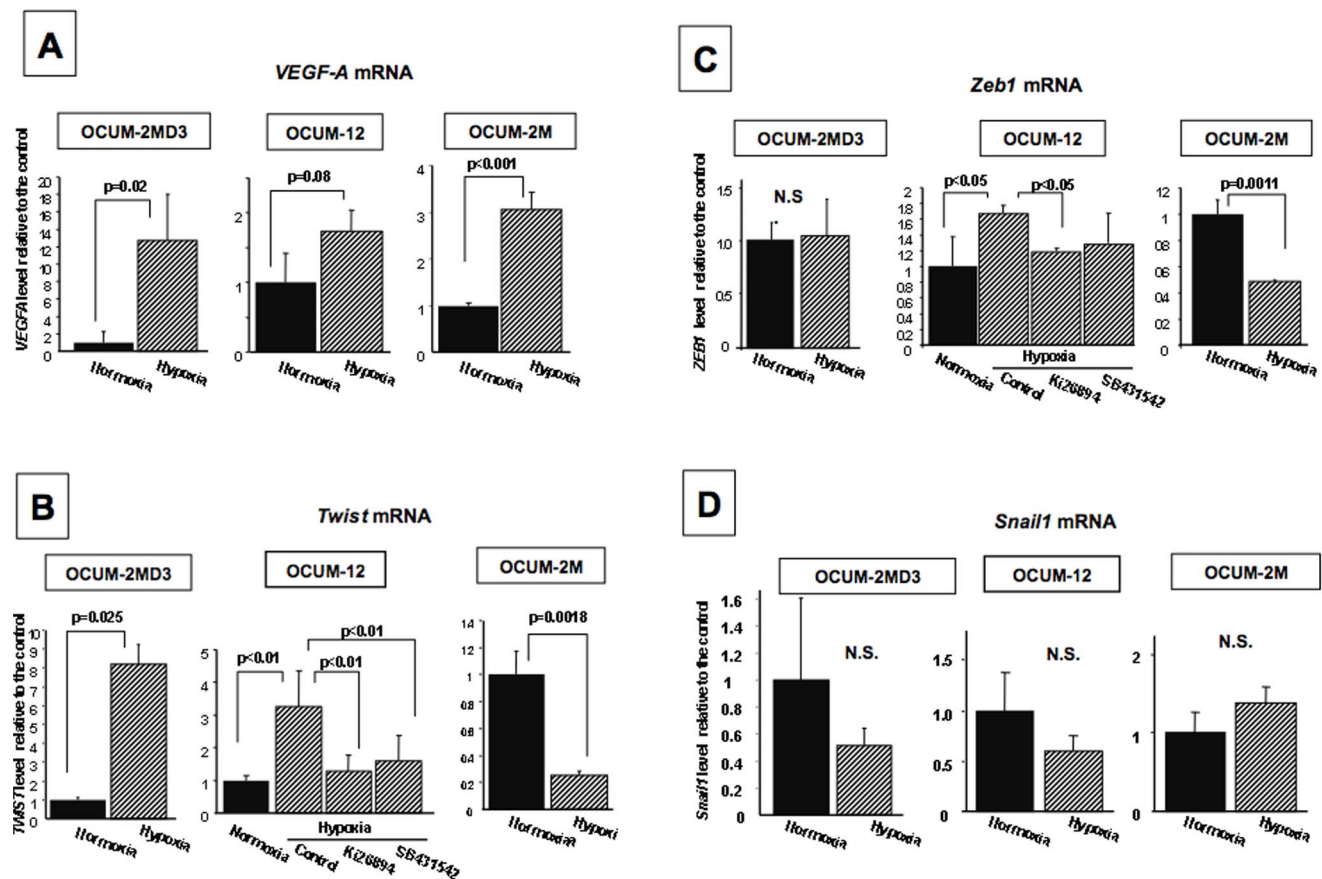

**Figure 6. Effects of hypoxic condition on the transcription factors associated with mesenchymal transition.** (A) A hypoxia-target molecule, *VEGF-A* mRNA level in OCUM-2M, OCUM-2MD3, and OCUM-12 was increased under hypoxia. (B, C) Hypoxic condition significantly increased the expression level of *Twist* and *Zeb1* in OCUM-2MD3 and OCUM-12 cells, but not that in OCUM-2M cells. (D) The expression level of *Snail1* was not affected by hypoxic condition. doi:10.1371/journal.pone.0062310.g006

Dunn's multiple comparison test. Differences were considered to be statistically significant when the P value was <0.05.

## Results

### Effects of hypoxia on the cancer cell morphology

A hypoxic condition significantly increased the number of polygonal or spindle-shaped cells undergoing EMT among OCUM-2MD3 or OCUM-12 cells, but not among OCUM-2M, MKN-7, MKN-45, MKN-74, or KATO-III cells (Fig. 1A and Fig. S1). The cell morphology of OCUM-2MD3 and OCUM-12 began changing after 4 h in the hypoxic culture. After 12 h of culture, an increased rate of EMT was seen in both cell lines. The EMT rate of OCUM-2MD3 and OCUM-12 cells was highest at 24 h hypoxic culture (Fig. 1B). Since the morphologic changes were evident at 24 h of culture under hypoxia, the molecular mechanisms of EMT were analyzed at 24 h of culture under hypoxic conditions using OCUM-2MD3, OCUM-12, and OCUM-2M cells.

### Effects of various growth factors on cancer cell morphology

Soluble factors were used at concentrations of 10 or 100 ng/ml. OCUM-2MD3 and OCUM-12 cells became spindle-shaped following the addition of TGF $\beta$ 1 or HGF, but not following the addition of EGF, FGF2, FGF7, IGF1, VEGF or PDGF-BB after 24 h under normoxia (Table 1). In contrast, OCUM-2M cells showed no morphologic change following the addition of any factors (Fig. 2).

### Effects of neutralizing antibodies on cancer cell morphology under hypoxia

EMT induced by hypoxia was partly inhibited by anti-TGF $\beta$ 1 antibody at 100  $\mu$ g/ml, but not by anti-HGF antibody (Table 2).

### Effects of hypoxia on TGF $\beta$ 1, TGF $\beta$ R1, and TGF $\beta$ R2 mRNA expression of gastric cancer cells

The expression level of TGF $\beta$  was significantly ( $p < 0.001$ ) increased under a hypoxic condition in all of OCUM-2MD3, OCUM-12, and OCUM-2M cells, in comparison with the level under normoxia (Fig. 3A). The expression levels of TGF $\beta$ R1 and TGF $\beta$ R2 were significantly increased under a hypoxic condition in OCUM-2MD3 cells. In contrast, the levels of TGF $\beta$ R1 and TGF $\beta$ R2 expression were significantly decreased under a hypoxic condition in OCUM-2M cells (Fig. 3B).

### Effect of hypoxia on TGF $\beta$ 1 production released from gastric cancer cells

TGF $\beta$ 1 production from OCUM-2MD3 and OCUM-12 cells was significantly ( $p < 0.001$ ) increased under hypoxia compared to normoxia, but not that from OCUM-2M cells (Fig. 3C).

### Effects of hypoxia on Smad2 phosphorylation of gastric cancer cell lines

In OCUM-2MD3 and OCUM-12 cells, Smad2 phosphorylation was increased under a hypoxic condition, compared to that under a normoxic condition. In contrast, Smad2 phosphorylation was not increased under a hypoxic condition in OCUM-2M cells (Fig. 4).

### Effects of phosphorylation kinase inhibitors on EMT and vimentin expression in hypoxia

Either of the TGF $\beta$ R phosphorylation inhibitors, Ki26894 and SB431542, inhibited the morphological changes of OCUM-2MD3 and OCUM-12 cells under a hypoxic condition, but three other inhibitors, Lapatinib, Sunitinib, and PHA665752, did not (Figure 5A, 5B). On the other hand, none of the inhibitors had any effect on the morphology of OCUM-2MD3 and OCUM-12 cells under normoxia (data not shown). The expression level of *vimentin*, which was used as an EMT marker, was significantly increased by hypoxia, and was decreased by either of the TGF $\beta$ R inhibitors Ki26894 and SB431542 (Figure 5C). Vimentin protein level was also increased under hypoxia, and was decreased by either of the TGF $\beta$ R inhibitors Ki26894 and SB431542 (Figure 5D).

**Effects of hypoxic condition on the factors associated with EMT.** Hypoxic condition significantly increased *VEGF-A* mRNA level in OCUM-2M, OCUM-2MD3, and OCUM-12 cells. The expression level of *Twist* or *Zeb1* was significantly increased by hypoxia in OCUM-2MD3 and OCUM-12 cells, but was decreased in OCUM-2M cells. The increased expression of *Twist* or *Zeb1* was decreased by either of the TGF $\beta$ R inhibitors Ki26894 and SB431542 in OCUM-12 cells. Hypoxic condition did not affect on the expression level of *Snail1* (Figure 6).

## Discussion

Recently, several studies have reported that a hypoxic microenvironment surrounding solid tumor cells might contribute to cancer progression [30–34]. However, the molecular mechanisms responsible for the cancer progression in hypoxia remain unclear. It has been reported that hypoxia is one of the triggers for EMT [35]. In the present study, a hypoxic condition induced EMT in the diffuse-type gastric cancer cell lines OCUM-2MD3 and OCUM-12, but not in intestinal-type cells. Diffuse-type gastric cancer is characterized by higher malignancy than intestinal-type gastric cancer [36]. The EMT potential of cancer cells under hypoxia might be one of the reasons for the high malignant potential of diffuse-type gastric cancer.

Many studies have reported that several molecules might affect EMT of cancer cells, including TGF $\beta$  [23,37], EGF [38], and PDGF [39]. In the present study, TGF $\beta$  stimulated EMT of OCUM-2MD3 and OCUM-12 cells, but EGF and PDGF did not. In addition, EMT induction under a hypoxic condition was significantly decreased by anti-TGF $\beta$  neutralizing antibody or TGF $\beta$ R phosphorylation inhibitors in both OCUM-2MD3 and OCUM-12 cells. Taken together, these results indicate that the production level of TGF $\beta$  in cancer cells was significantly increased under hypoxia, and the expression levels of TGF $\beta$ R and Smad2 phosphorylation were increased by hypoxia. Vimentin is a characteristic component of mesenchymal cells and is not usually expressed in epithelial cells. Because the expression of *vimentin* in epithelial cells plays an essential role in EMT through the interaction with actin and other intermediate filaments [40], vimentin was used as an EMT marker in this study. The expression level of *vimentin* was significantly increased by hypoxia, and was decreased by the TGF $\beta$ R phosphorylation inhibitors Ki26894 and SB431542. These findings suggested that EMT under a hypoxic condition is associated with the autocrine TGF $\beta$ /TGF $\beta$ R signaling in diffuse-type gastric cancer. Several studies reported the correlations between EMT and TGF $\beta$  signaling in hypoxia. [2,21,23,32,37] In gastric cancer, it has been reported that EMT is correlated with malignancy of cancer cells and responsible for cancer invasion and metastasis. However the

mechanisms responsible for EMT of gastric cancer cells remain unclear. This paper clarified that EMT of gastric cancer cells was induced via TGF $\beta$  signaling under hypoxia. TGF $\beta$ R inhibitors might thus be promising agents for the treatment of gastric cancer metastasis.

Hypoxia stimulated EMT of OCUM-2MD3 cells, but not that of OCUM-2M cells. EMT has been implicated in promoting cancer invasion and metastasis. While OCUM-2MD3 is a “daughter” cell line of OCUM-2M [25,34], OCUM-2MD3 cells have higher potential for metastasis to the peritoneum in nude mice than OCUM-2M cells [25,34]. Cancer cells free to migrate in the peritoneal cavity are exposed to hypoxia due to the lack of a proximal feeding vessel [41]. The expression level of *TGF $\beta$ 1* mRNA under hypoxia was significantly higher than that under normoxia in all three of the cell lines. In contrast, the expression level of *TGF $\beta$ R1* and *TGF $\beta$ R2* mRNA was significantly increased by hypoxia in OCUM-2MD3 cells, but not in OCUM-2M cells. The different responses of *TGF $\beta$ R* expression between normoxia and hypoxia might be one of the key reasons for the hypoxia-induced EMT. We previously reported that gastric cancer cells under hypoxia showed EMT and high migratory and invasive activities in comparison with cancer cells in normoxia [34]. The up-regulation of EMT of hypoxic cancer cells might be one of the reasons for the higher potential for metastasis to the peritoneum in OCUM-2MD3 cells compared to OCUM-2M cells.

Hypoxic condition significantly increased the expression level of *Twist* and *Zeb1* in OCUM-2MD3 and OCUM-12 cells, but not that in OCUM-2M cells. The hypoxia-increasing activity of *Twist* and *Zeb1* expression was decreased with TGF $\beta$ R inhibitors (Ki26894 and SB431542) in OCUM-12 cells. EMT in hypoxia might be partly regulated by transcription factors, *Twist* and *Zeb1*.

Although HGF affected the cancer cell morphology in OCUM-2MD3 and OCUM-12 cells, hypoxia-induced EMT was not

inhibited by anti-HGF neutralizing antibody or c-Met inhibitor in either OCUM-2MD3 or OCUM-12 cells. HGF production was not detected in OCUM-2MD3 or OCUM-12 cells under either hypoxia and normoxia (data not shown). Most of HGF is derived from stromal cells in gastric cancer [42]. While HGF might not play an important role for hypoxia-induced EMT, HGF might stimulate EMT of cancer cells via the cancer-stromal interaction.

The hypoxia-induced EMT of OCUM-2MD3 cells was partly inhibited by TGF $\beta$ R inhibitors, but various other inhibitors, including c-Met inhibitor, PDGF inhibitor, EGFR inhibitor, and VEGFR inhibitor, had no effect on the hypoxia-induced EMT in this study. These findings suggest that other factor(s) might be associated with hypoxia-induced EMT in some cancer cells. In future studies, it will be necessary to examine other new factors which can alter cancer morphology.

In conclusion, the autocrine TGF $\beta$ /TGF $\beta$ R signaling under hypoxia might be one of the factors associated with the aggressive phenotype of EMT in gastric carcinoma cells. TGF $\beta$ /TGF $\beta$ R signaling inhibitors appear to be therapeutically promising in gastric cancer.

## Supporting Information

**Figure S1 Morphologic changes of gastric cells under a hypoxic condition.** In MKN-7, MKN-45, MKN-74, and KATO-III, morphologic changes were not found under hypoxia. (TIF)

## Author Contributions

Conceived and designed the experiments: MY T. Sawada KH. Performed the experiments: JM NA T. Hirakawa T. Hasegawa. Analyzed the data: JM MY YF NY SN. Contributed reagents/materials/analysis tools: KS T. Shimizu AM YD YK SK OS. Wrote the paper: JM MY.

## References

- Klymkowsky MW, Savagner P (2009) Epithelial-mesenchymal transition: a cancer researcher's conceptual friend and foe. *Am J Pathol* 174: 1588–1593.
- Moustakas A, Heldin CH (2007) Signaling networks guiding epithelial-mesenchymal transitions during embryogenesis and cancer progression. *Cancer Sci* 98: 1512–1520.
- Shinto O, Yashiro M, Kawajiri H, Shimizu K, Shimizu T, et al. (2010) Inhibitory effect of a TGFbeta receptor type-I inhibitor, Ki26894, on invasiveness of scirrhous gastric cancer cells. *Br J Cancer* 102: 844–851.
- Kalluri R, Weinberg RA (2009) The basics of epithelial-mesenchymal transition. *J Clin Invest* 119: 1420–1428.
- Zeisberg M, Neilson EG (2009) Biomarkers for epithelial-mesenchymal transitions. *J Clin Invest* 119: 1429–1437.
- Lunt SJ, Chaudary N, Hill RP (2009) The tumor microenvironment and metastatic disease. *Clin Exp Metastasis* 26: 19–34.
- Beltrao Hde B, Cerroni Mde P, Freitas DR, Pinto AY, Valente Vda C, et al. (2009) Investigation of two outbreaks of suspected oral transmission of acute Chagas disease in the Amazon region, Para State, Brazil, in 2007. *Trop Doct* 39: 231–232.
- Xing F, Okuda H, Watabe M, Kobayashi A, Pai SK, et al. (2011) Hypoxia-induced Jagged2 promotes breast cancer metastasis and self-renewal of cancer stem-like cells. *Oncogene* 30: 4075–4086.
- Zhong H, De Marzo AM, Laughner E, Lim M, Hilton DA, et al. (1999) Overexpression of hypoxia-inducible factor 1alpha in common human cancers and their metastases. *Cancer Res* 59: 5830–5835.
- Griffiths EA, Pritchard SA, Valentine HR, Whitchole N, Bishop PW, et al. (2007) Hypoxia-inducible factor-1alpha expression in the gastric carcinogenesis sequence and its prognostic role in gastric and gastro-oesophageal adenocarcinomas. *Br J Cancer* 96: 95–103.
- Griffiths EA, Pritchard SA, Welch IM, Price PM, West CM (2005) Is the hypoxia-inducible factor pathway important in gastric cancer? *Eur J Cancer* 41: 2792–2805.
- Massague J (2008) TGFbeta in Cancer. *Cell* 134: 215–230.
- Zavadil J, Bottinger EP (2005) TGF-beta and epithelial-to-mesenchymal transitions. *Oncogene* 24: 5764–5774.
- Smith A, Teknos TN, Pan Q (2012) Epithelial to mesenchymal transition in head and neck squamous cell carcinoma. *Oral Oncol*.
- Sabbah M, Emami S, Redeuilh G, Julien S, Prevost G, et al. (2008) Molecular signature and therapeutic perspective of the epithelial-to-mesenchymal transitions in epithelial cancers. *Drug Resist Updat* 11: 123–151.
- Miyazono K, Ehata S, Koinuma D (2012) Tumor-promoting functions of transforming growth factor-beta in progression of cancer. *Ups J Med Sci* 117: 143–152.
- Hung CM, Kuo DH, Chou CH, Su YC, Ho CT, et al. (2011) Osteole suppresses hepatocyte growth factor (HGF)-induced epithelial-mesenchymal transition via repression of the c-Met/Akt/mTOR pathway in human breast cancer cells. *J Agric Food Chem* 59: 9683–9690.
- Alejandro Alcazar MA, Morty RE, Lendzian L, Vohlen C, Oestreicher I, et al. (2011) Inhibition of TGF-beta Signaling and Decreased Apoptosis in IUGR-Associated Lung Disease in Rats. *PLoS One* 6: e26371.
- Heldin CH, Miyazono K, ten Dijke P (1997) TGF-beta signalling from cell membrane to nucleus through SMAD proteins. *Nature* 390: 465–471.
- Kretzschmar M, Massague J (1998) SMADs: mediators and regulators of TGF-beta signaling. *Curr Opin Genet Dev* 8: 103–111.
- Copple BL (2010) Hypoxia stimulates hepatocyte epithelial to mesenchymal transition by hypoxia-inducible factor and transforming growth factor-beta-dependent mechanisms. *Liver Int* 30: 669–682.
- Iwatsuki M, Mimori K, Fukagawa T, Ishii H, Yokobori T, et al. (2010) The clinical significance of vimentin-expressing gastric cancer cells in bone marrow. *Ann Surg Oncol* 17: 2526–2533.
- Zhou G, Dada LA, Wu M, Kelly A, Trejo H, et al. (2009) Hypoxia-induced alveolar epithelial-mesenchymal transition requires mitochondrial ROS and hypoxia-inducible factor 1. *Am J Physiol Lung Cell Mol Physiol* 297: L1120–1130.
- Haase VH (2009) Oxygen regulates epithelial-to-mesenchymal transition: insights into molecular mechanisms and relevance to disease. *Kidney Int* 76: 492–499.
- Yashiro M, Chung YS, Nishimura S, Inoue T, Sowa M (1996) Peritoneal metastatic model for human scirrhous gastric carcinoma in nude mice. *Clin Exp Metastasis* 14: 43–54.
- Qiu H, Yashiro M, Shinto O, Matsuzaki T, Hirakawa K (2009) DNA methyltransferase inhibitor 5-aza-CdR enhances the radiosensitivity of gastric cancer cells. *Cancer Sci* 100: 181–188.



27. Yashiro M, Chung YS, Nishimura S, Inoue T, Sowa M (1995) Establishment of two new scirrhous gastric cancer cell lines: analysis of factors associated with disseminated metastasis. *Br J Cancer* 72: 1200–1210.
28. Sekiguchi M, Sakakibara K, Fujii G (1978) Establishment of cultured cell lines derived from a human gastric carcinoma. *Jpn J Exp Med* 48: 61–68.
29. Motoyama T, Hojo H, Watanabe H (1986) Comparison of seven cell lines derived from human gastric carcinomas. *Acta Pathol Jpn* 36: 65–83.
30. Bartkowiak K, Riethdorf S, Pantel K (2011) The Interrelating Dynamics of Hypoxic Tumor Microenvironments and Cancer Cell Phenotypes in Cancer Metastasis. *Cancer Microenviron.*
31. Gupta R, Chetty C, Bhoopathi P, Lakka S, Mohanam S, et al. (2011) Downregulation of uPA/uPAR inhibits intermittent hypoxia-induced epithelial-mesenchymal transition (EMT) in DAOY and D283 medulloblastoma cells. *Int J Oncol* 38: 733–744.
32. Guan F, Schaffer L, Handa K, Hakomori SI (2010) Functional role of gangliotetraacylceramide in epithelial-to-mesenchymal transition process induced by hypoxia and by TGF- $\beta$ . *Faseb J* 24: 4889–4903.
33. Noda S, Yashiro M, Nshii T, Hirakawa K (2010) Hypoxia upregulates adhesion ability to peritoneum through a transforming growth factor- $\beta$ -dependent mechanism in diffuse-type gastric cancer cells. *Eur J Cancer* 46: 995–1005.
34. Kato Y, Yashiro M, Noda S, Tendo M, Kashiwagi S, et al. (2010) Establishment and characterization of a new hypoxia-resistant cancer cell line, OCUM-12/Hypo, derived from a scirrhous gastric carcinoma. *Br J Cancer* 102: 898–907.
35. Polyak K, Weinberg RA (2009) Transitions between epithelial and mesenchymal states: acquisition of malignant and stem cell traits. *Nat Rev Cancer* 9: 265–273.
36. Chen CY, Wu CW, Lo SS, Hsieh MC, Lui WY, et al. (2002) Peritoneal carcinomatosis and lymph node metastasis are prognostic indicators in patients with Borrmann type IV gastric carcinoma. *Hepatogastroenterology* 49: 874–877.
37. Horiguchi K, Shirakihara T, Nakano A, Imamura T, Miyazono K, et al. (2009) Role of Ras signaling in the induction of snail by transforming growth factor- $\beta$ . *J Biol Chem* 284: 245–253.
38. Vergara D, Valente CM, Tinelli A, Siciliano C, Lorusso V, et al. (2011) Resveratrol inhibits the epidermal growth factor-induced epithelial mesenchymal transition in MCF-7 cells. *Cancer Lett* 310: 1–8.
39. Devarajan E, Song YH, Krishnappa S, Alt E (2011) Epithelial-mesenchymal transition in breast cancer lines is mediated through PDGF-D released by tissue-resident stem cells. *Int J Cancer*.
40. Ivaska J (2011) Vimentin: Central hub in EMT induction? *Small Gtpases* 2: 51–53.
41. Kizaka-Kondoh S, Itasaka S, Zeng L, Tanaka S, Zhao T, et al. (2009) Selective killing of hypoxia-inducible factor-1-active cells improves survival in a mouse model of invasive and metastatic pancreatic cancer. *Clin Cancer Res* 15: 3433–3441.
42. Zhang W, Chu YQ, Ye ZY, Zhao ZS, Tao HQ (2009) Expression of hepatocyte growth factor and basic fibroblast growth factor as prognostic indicators in gastric cancer. *Anat Rec (Hoboken)* 292: 1114–1121.
